# Supplementary material for: Neural activation patterns evoked by social inference in the laboratory predict the number of real-life social contacts
Source: Research Square preprint supplement (doi:10.21203/rs.3.rs-2072358/v1), 2022-09-23
Supplement: Supplementary file 1 [file 016917308e1a87b5cb5c6973.pdf]

## Supplemental Material

### Neural activation patterns evoked by social inference in the laboratory predict real-life social network index

Anita Tusche <sup>1,2,3\*</sup>, Robert Spunt <sup>1</sup>, Lynn Paul <sup>1</sup>, Julian Michael Tyszka <sup>1</sup>, Ralph Adolphs <sup>1</sup>

<sup>1</sup> Division of the Humanities and Social Sciences, California Institute of Technology, Pasadena, CA 91125, U.S.A.

<sup>2</sup> Department of Psychology, Queen's University, Kingston, Ontario K7L 3N6, Canada

<sup>3</sup> Department of Economics, Queen's University, Kingston, Ontario K7L 3N6, Canada

\* Corresponding author:

Anita Tusche

Queen's University

344 Humphrey Hall

Ontario K7L 3N6, Canada

Phone: +1 (613) 533-2351

Email: [anita.tusche@gmail.com](mailto:anita.tusche@gmail.com)

## Table of Contents

|                                                                                                                                        |    |
|----------------------------------------------------------------------------------------------------------------------------------------|----|
| Table S1. Positive inter-correlation of SNI scores in DS, RS1, RS2 and ASD .....                                                       | 3  |
| Table S2. Behavioral performance in the why/how task (fMRI) .....                                                                      | 4  |
| Table S3. Block-specific question endings used in the why/how tasks .....                                                              | 5  |
| Table S4. Brain regions decoding social inferences in Face blocks in the why/how fMRI task in DS.....                                  | 6  |
| Table S5. Brain regions decoding social inferences in Hand blocks in the why/how task in DS .....                                      | 7  |
| Table S6. Univariate results of social inference [why vs how] in DS .....                                                              | 8  |
| Table S7. Shared neural code for social inferences [why vs. how] in the why/how task for ASD and RS1<br>(cross-sample decoding). ..... | 10 |
| Figure S1. Cross-stimulus-set decoding of social inferences in the why/how task in DS.....                                             | 11 |
| Figure S2. Overlap of univariate and multivariate analyses of social inferences in the why/how task in<br>DS. ....                     | 12 |
| Figure S3. Correspondence of our pSTS ROI with previous pSTS findings. ....                                                            | 13 |
| Results S1. Stimulus-specific decoding of social inferences in the why/how task in DS.....                                             | 14 |
| Methods S1. Detailed description of fMRI data preprocessing in RS2 (fmriPrep) .....                                                    | 15 |

**Table S1. Positive inter-correlation of SNI scores in DS, RS1, RS2 and ASD**

|                     | Social Network Size | Network Diversity | # Embedded Networks |
|---------------------|---------------------|-------------------|---------------------|
| <i>DS</i>           |                     |                   |                     |
| Social Network Size |                     | 0.79 **           | 0.91 **             |
| Network Diversity   |                     |                   | 0.65 **             |
| # Embedded Networks |                     |                   |                     |
| <i>RS1</i>          |                     |                   |                     |
| Social Network Size |                     | 0.68 *            | 0.83 **             |
| Network Diversity   |                     |                   | 0.25                |
| # Embedded Networks |                     |                   |                     |
| <i>ASD</i>          |                     |                   |                     |
| Social Network Size |                     | 0.85 **           | 0.86 **             |
| Network Diversity   |                     |                   | 0.57 *              |
| # Embedded Networks |                     |                   |                     |
| <i>RS2</i>          |                     |                   |                     |
| Social Network Size |                     | 0.80 **           | 0.83 **             |
| Network Diversity   |                     |                   | 0.70 **             |
| # Embedded Networks |                     |                   |                     |

\*\*  $p \leq 0.0001$ , \*  $p < 0.005$

**Table S2. Behavioral performance in the why/how task (fMRI)**

|                     | Social Inferences (why) |              | Factual Inferences (how) |              |
|---------------------|-------------------------|--------------|--------------------------|--------------|
|                     | Faces                   | Hands        | Faces                    | Hands        |
| <i>DS</i>           |                         |              |                          |              |
| Accuracy [%]        | 93.18 (4.65)            | 94.29 (5.60) | 95.46 (3.21)             | 95.50 (4.41) |
| Response time [sec] | 0.65 (0.14)             | 0.71 (0.12)  | 0.55 (0.11)              | 0.68 (0.11)  |
| d-prime             | 3.26 (0.75)             | 3.55 (0.87)  | 3.52 (0.67)              | 3.74 (0.70)  |
| <i>RS1</i>          |                         |              |                          |              |
| Accuracy [%]        | 90.07 (4.43)            | 94.88 (5.56) | 97.41 (2.79)             | 93.32 (3.62) |
| Response time [sec] | 0.95 (0.14)             | 0.98 (0.16)  | 0.81 (0.13)              | 0.93 (0.14)  |
| d-prime             | 2.79 (0.54)             | 3.47 (0.82)  | 3.96 (0.67)              | 3.09 (0.55)  |
| <i>ASD</i>          |                         |              |                          |              |
| Accuracy [%]        | 88.93 (6.74)            | 90.63 (7.33) | 96.50 (4.33)             | 91.63 (4.37) |
| Response time [sec] | 1.00 (0.18)             | 1.04 (0.17)  | 0.84 (0.15)              | 0.97 (0.15)  |
| d-prime             | 2.76 (0.73)             | 2.88 (0.90)  | 3.82 (0.86)              | 2.97 (0.55)  |
| <i>RS2</i>          |                         |              |                          |              |
| Accuracy [%]        | 89.80 (4.77)            | 94.96 (4.46) | 96.63 (3.68)             | 96.43 (3.02) |
| Response time [sec] | 0.84 (0.10)             | 0.86 (0.09)  | 0.70 (0.08)              | 0.81 (0.09)  |
| d-prime             | 2.72 (0.53)             | 3.51 (0.78)  | 3.82 (0.76)              | 3.69 (0.66)  |

Mean ( $\pm$  SD); Note that the why/how social inference task performed by the discovery sample (DS) differed in several details from the task version performed by the healthy replication sample (RS) and the ASD group.



**Table S3. Block-specific question endings used in the why/how tasks**

|                          | Stimulus category                                                                                                                                                                                                |                                                                                                                                                                                                                        |                                                                                                                                                                                            |
|--------------------------|------------------------------------------------------------------------------------------------------------------------------------------------------------------------------------------------------------------|------------------------------------------------------------------------------------------------------------------------------------------------------------------------------------------------------------------------|--------------------------------------------------------------------------------------------------------------------------------------------------------------------------------------------|
|                          | Faces                                                                                                                                                                                                            | Hands                                                                                                                                                                                                                  | Non-Social                                                                                                                                                                                 |
| <i>DS</i>                |                                                                                                                                                                                                                  |                                                                                                                                                                                                                        |                                                                                                                                                                                            |
| WHY (social inference)   | <p>Is the person...</p> <p>...admiring someone?</p> <p>...expressing self-doubt?</p> <p>...in an argument?</p> <p>...proud of themselves?</p>                                                                    | <p>Is the person...</p> <p>...competing against others?</p> <p>...concerned with their health?</p> <p>...helping someone?</p> <p>...protecting themselves?</p>                                                         | <p>-</p> <p>-</p> <p>-</p> <p>-</p>                                                                                                                                                        |
| HOW (factual)            | <p>...looking at the camera?</p> <p>...looking to their side?</p> <p>...opening their mouth?</p> <p>...smiling?</p>                                                                                              | <p>...lifting something?</p> <p>...pressing a button?</p> <p>...reaching for something?</p> <p>...using both hands?</p>                                                                                                | <p>-</p> <p>-</p> <p>-</p> <p>-</p>                                                                                                                                                        |
| <i>RS1, RS2, and ASD</i> |                                                                                                                                                                                                                  |                                                                                                                                                                                                                        |                                                                                                                                                                                            |
| WHY (social inference)   | <p>Is the person...</p> <p>...being affectionate?</p> <p>...expressing self-doubt?</p> <p>...proud of themselves?</p> <p>...celebrating something?</p> <p>...expressing gratitude?</p> <p>...in an argument?</p> | <p>Is the person...</p> <p>...protecting themselves?</p> <p>...helping someone?</p> <p>...doing their job?</p> <p>...competing against others?</p> <p>...expressing themselves?</p> <p>...sharing knowledge?</p>       | <p>Is it a result of...</p> <p>...Spring season?</p> <p>...a drought?</p> <p>...a forest fire?</p> <p>...a hurricane?</p> <p>...a rainstorm?</p> <p>...going to result in a rainstorm?</p> |
| HOW (factual)            | <p>Is the person...</p> <p>...looking at the camera?</p> <p>...showing their teeth?</p> <p>...gazing up?</p> <p>...opening their mouth?</p> <p>...looking to the side?</p> <p>...smiling?</p>                    | <p>Is the person...</p> <p>...carrying something?</p> <p>...lifting something up?</p> <p>...putting something on?</p> <p>...reaching for something?</p> <p>...using a writing utensil?</p> <p>...using both hands?</p> | <p>Is the photo showing...</p> <p>...clouds?</p> <p>...colorful flowers?</p> <p>...dry ground?</p> <p>...moving water?</p> <p>...palm trees?</p> <p>...smoke?</p>                          |

**Table S4. Brain regions decoding social inferences in Face blocks in the why/how fMRI task in DS**

| Brain region                   | Side | k   | t    | MNI |     |    |
|--------------------------------|------|-----|------|-----|-----|----|
|                                |      |     |      | x   | y   | z  |
| pSTG/SMG (supramarginal gyrus) | L    | 778 | 7.50 | -56 | -48 | 38 |
| pSTG                           | R    | 83  | 6.31 | 48  | -60 | 20 |
| SMG                            | R    | 471 | 6.79 | 50  | -44 | 42 |
| DMPFC                          | L    | 493 | 9.59 | -8  | 56  | 32 |
| DMPFC/SMA                      | L    | 9   | 5.83 | -8  | 32  | 52 |
| DMPFC                          | R    | 284 | 7.19 | 6   | 52  | 28 |
| DLPFC                          | L    | 331 | 8.94 | -48 | 14  | 30 |
| DLPFC                          | R    | 243 | 8.04 | 52  | 14  | 20 |
| VLPFC                          | L    | 190 | 7.40 | -48 | 32  | 8  |
| SFS                            | L    | 34  | 5.62 | -30 | 28  | 44 |
| SFS                            | R    | 7   | 5.46 | 30  | 32  | 44 |

Results are reported at a statistical threshold of  $p < 0.05$ , FWE corrected at voxel-level (cluster threshold of 5 voxels); only peak activations of clusters are reported; L = left hemisphere, R = right hemisphere, MNI = Montreal Neurological Institute, k = cluster size in voxels.

**Table S5. Brain regions decoding social inferences in Hand blocks in the why/how task in DS**

| Brain region                             | Side | k    | t     | MNI |     |     |
|------------------------------------------|------|------|-------|-----|-----|-----|
|                                          |      |      |       | x   | y   | z   |
| pSTG (posterior superior temporal gyrus) | L    | 5077 | 19.09 | -46 | -66 | 24  |
| pSTG                                     | R    | 536  | 8.93  | 48  | -62 | 22  |
| MTG (middle temporal sulcus)             | L    | 168  | 6.53  | -62 | -14 | -12 |
| MTG                                      | L    | 37   | 6.14  | -54 | 6   | -22 |
| MTG                                      | L    | 22   | 5.67  | -44 | 12  | -34 |
| DMPFC, extending to DLPFC, VLPFC and SFS | L    | 2479 | 10.71 | -30 | 16  | 52  |
| DMPFC                                    | R    | 166  | 7.60  | 4   | 58  | 24  |
| mOFC                                     | L    | 112  | 6.46  | -8  | 56  | -16 |
| mOFC                                     | R    | 45   | 5.73  | 2   | 54  | -20 |
| PCC/Precuneus                            | L/R  | 538  | 7.11  | -6  | -52 | 42  |
| Cerebellum                               | L    | 680  | 10.33 | 26  | -76 | -40 |

Results are reported at a statistical threshold of  $p < 0.05$ , FWE corrected at voxel-level (cluster threshold of 5 voxels); only peak activations of clusters are reported; L = left hemisphere, R = right hemisphere, MNI = Montreal Neurological Institute, k = cluster size in voxels.

**Table S6. Univariate results of social inference [why vs how] in DS**

| Brain region                                        | Side | k    | t     | x   | y   | z   |
|-----------------------------------------------------|------|------|-------|-----|-----|-----|
| <i>[why &gt; how]</i>                               |      |      |       |     |     |     |
| pSTS                                                | L    | 267  | 15.29 | -48 | -66 | 34  |
| pSTS                                                | R    | 25   | 8.68  | 54  | -64 | 30  |
| MPFC                                                | L    | 4750 | 15.15 | -10 | 44  | 46  |
| Middle frontal gyrus                                | L    | 63   | 9.93  | -42 | 18  | 48  |
| Inferior frontal gyrus                              | R    | 25   | 6.64  | 60  | 28  | 22  |
| VLPFC                                               | R    | 82   | 6.96  | 38  | 30  | -16 |
| VLPFC to temporal pole and middle temporal gyrus    | L    | 2729 | 14.14 | -60 | -8  | -22 |
| Temporal pole (to inferior temporal gyrus)          | R    | 688  | 9.82  | 52  | 10  | -34 |
| Middle temporal gyrus                               | L    | 100  | 8.39  | -48 | -34 | -2  |
| PCC and Precuneus                                   | L    | 779  | 13.98 | -8  | -44 | 34  |
| Hippocampus                                         | L    | 18   | 7.19  | -24 | -20 | -16 |
| Cerebellum                                          | R    | 581  | 11.7  | 26  | -82 | -40 |
| Cerebellum                                          | R    | 63   | 8.13  | 4   | -56 | -48 |
| Cerebellum                                          | L    | 108  | 7.67  | -26 | -78 | -36 |
| <i>[how &gt; why]</i>                               |      |      |       |     |     |     |
| SMG (supramarginal gyus, to inferior parietal lobe) | L    | 2577 | 12.39 | -40 | -40 | 42  |
| SMG                                                 | R    | 1869 | 9.85  | 64  | -30 | 36  |
| ITG (inferior temporal gyrus)                       | L    | 155  | 12.79 | -52 | -60 | -2  |
| ITG                                                 | R    | 110  | 9.51  | 52  | -56 | -6  |
| Pre-SMA                                             | L    | 185  | 8.62  | -26 | -2  | 50  |
| Pre-SMA                                             | R    | 109  | 6.44  | 26  | -2  | 50  |
| LPFC                                                | L    | 94   | 8.27  | -48 | 4   | 24  |
| LPFC                                                | R    | 30   | 6.38  | 48  | 10  | 16  |
| Cerebellum                                          | L    | 19   | 7.26  | -16 | -70 | -44 |

Results are reported at a statistical threshold of  $p < 0.05$ , FWE corrected at voxel-level (cluster threshold of 5 voxels) for the conjunction of face and hand blocks (inclusive masking function, SPM12); only peak activations of clusters are reported; L = left hemisphere, R = right hemisphere, MNI = Montreal Neurological Institute, k = cluster size in voxels.

**Table S7. Shared neural code for social inferences [why vs. how] in the why/how task for ASD and RS1 (cross-sample decoding).**

| ROI      | Decoding Accuracy [%] |
|----------|-----------------------|
| L_pSTS   | 62 [47, 53] *         |
| R_pSTS   | 55 [47, 52] *         |
| L_DMPFC  | 60 [47, 53] *         |
| R_DMPFC  | 60 [48, 52] *         |
| L_SFS    | 60 [48, 52] *         |
| L_DLPFC  | 61 [48, 53] *         |
| L_VLPPFC | 62 [47, 53] *         |

\*  $p < 0.05$ , FDR corrected, permutation test; activation patterns in each ROI obtained for neurotypical individuals (RS1) allowed decoding social inferences in ASD, and vice versa.

### Figure S1. Cross-stimulus-set decoding of social inferences in the why/how task in DS.

Our predictive analyses collapsed across both stimulus sets of the why/how task (faces, hands). For each ROI, a supplemental decoding analysis further explored whether similar neural codes encode social inferences in both target categories of the task (hands/faces) in the DS group. The analyses approach matched the one described for the whole-brain searchlight decoding (see main manuscript) with two exceptions: First, neural pattern vectors were extracted for all voxels within a particular *ROI*. Second, the classifier was trained on data of one target condition (e.g. faces) and tested on data of the other (e.g. hands), and vice versa (2-fold cross-validation). Post hoc permutation tests further illustrated that decoding accuracies in ROIs (displayed as triangles that represent the average across 2 cross-validation steps), are unlikely achieved by chance (all  $p$ 's < 0.001, permutation tests, FDR corrected). Boxplots represent null distributions of classification accuracies in each ROI (1000 permutations). Central marks of boxplots indicate medians, which were found to be 50% (i.e., chance level, dotted line) for all clusters. Edges of boxes indicate the 25th–75th percentiles; whiskers extend to extreme data points; circles represent outliers. Our significant cross-target predictions of social (vs. factual) inferences in this analyses approach suggest that – at least part of – the neural code in each ROI is shared across target conditions (face/hands) in the why/how task.

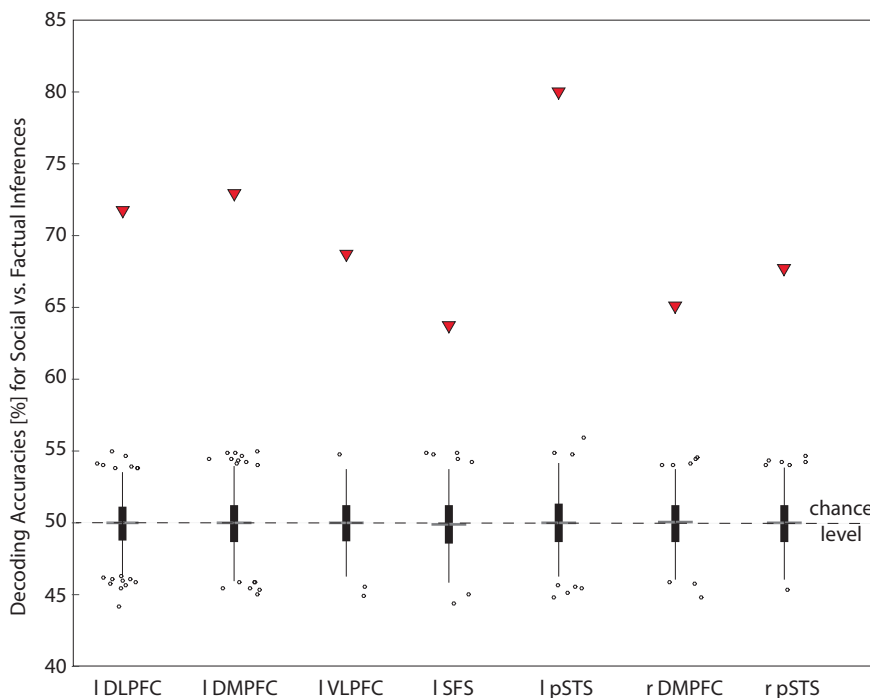

**Figure S2. Overlap of univariate and multivariate analyses of social inferences in the why/how task in DS.**

*Univariate results:* For each subject (discovery sample, DS), we contrasted neural responses obtained during [why > how] inferences using block-wise regressors estimated in GLM1, separately for each stimulus set in the why/how task (faces, hands). Individual contrast images were used in two group-level analyses (simple t-tests against baseline as implemented in SPM12). *Multivariate analyses* of why vs. how task blocks (GLM1) were realized for each subject using a leave-two-block-out cross-validation approach (one why block, one how block in each fold), separately for each stimulus set. Individuals' accuracy maps were then used in a group-level analyses, separately for each stimulus condition (simple t-tests against implicit chance level of 50% for binary classification, as implemented in SPM12). Results of both analyses are displayed at a statistical threshold of  $p < 0.05$ , whole-brain FWE corrected, cluster-threshold of 5 voxels.

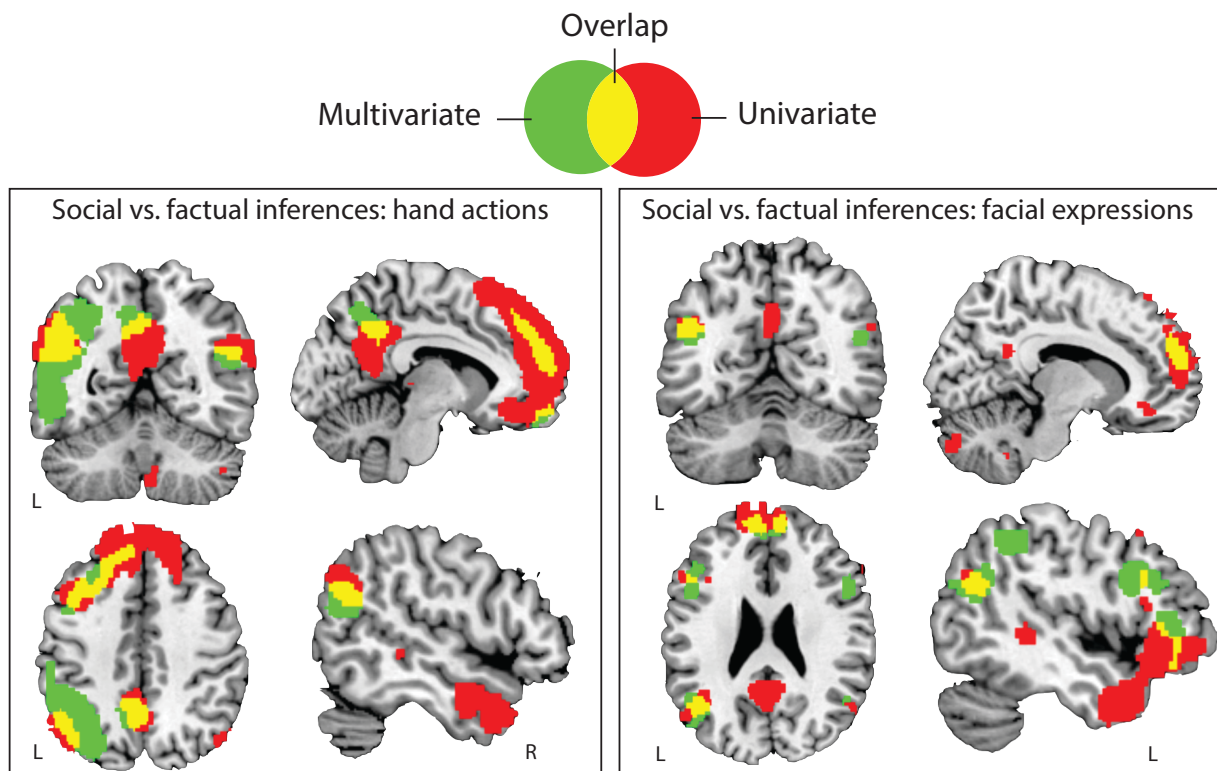



**Figure S3. Correspondence of our pSTS ROI with previous pSTS findings.**

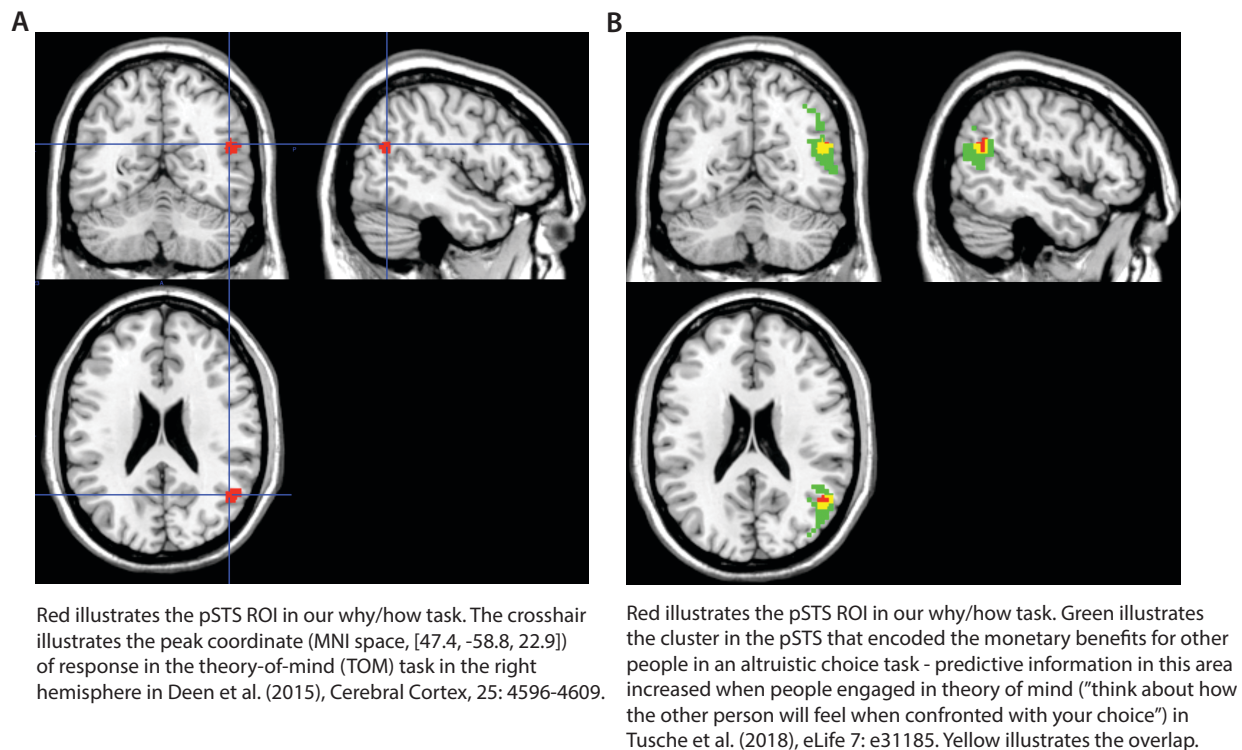

## **Results S1. Stimulus-specific decoding of social inferences in the why/how task in DS.**

Are there brain regions that encoded social inferences significantly more – or less – depending on the stimulus set (hands/faces) in the why/how task? To address this question, we compared whole-brain decoding accuracy maps of social inferences obtained for face blocks and hand blocks of the why/how task (see Table S4 and Table S5 for details on predictive cluster obtained for each stimulus set). Formal comparisons of decoding maps for social inferences obtained in [Faces > Hands] did not yield significant results ( $p < 0.05$ , FWE corrected, cluster-threshold = 5 voxels; paired t-test as implemented in SPM12). The reverse contrast [Hands > Faces] identified a cluster in the left pSTS/ TPJ ([MNI -38, -66, 40],  $t = 6.50$ , 936 voxels) and right Cerebellum ([MNI 28, -78, -40],  $t = 5.58$ , 119 voxels), suggesting that images of intentional hand actions more effectively elicited social inferences in both areas (reflected in higher decoding accuracies). Importantly, the identified cluster in the pSTS/TPJ overlapped with the pSTS cluster described in Table 2. Overall, these supplemental results demonstrate a close match of recruited brain areas and predictive information across stimulus categories. The findings also suggest that our data-driven approach of defining ROIs did not systematically exclude brain areas selectively recruited for one but not the other stimulus set in the why/how task.

## Methods S1. Detailed description of fMRI data preprocessing in RS2 (fmriPrep)

Results included in this manuscript come from preprocessing performed using *fmriPrep* 1.5.3 [1], which is based on *Nipype* 1.3.1 [2].

### Anatomical data preprocessing

A total of 6 T1-weighted (T1w) images were found within the input BIDS dataset. All of them were corrected for intensity non-uniformity (INU) with *N4BiasFieldCorrection* [3], distributed with ANTs 2.2.0 [4]. The T1w-reference was then skull-stripped with a *Nipype* implementation of the *antsBrainExtraction.sh* workflow (from ANTs), using OASIS30ANTs as target template. Brain tissue segmentation of cerebrospinal fluid (CSF), white-matter (WM) and gray-matter (GM) was performed on the brain-extracted T1w using *fast* [5] from FSL 5.0.9. A T1w-reference map was computed after registration of 6 T1w images (after intensity non-uniformity correction) using *mri\_robust\_template* from FreeSurfer 6.0.1 [6]. Volume-based spatial normalization to one standard space (MNI152NLin6Asym) was performed through nonlinear registration with *antsRegistration* (ANTs 2.2.0), using brain-extracted versions of both T1w reference and the T1w template. The following template was selected for spatial normalization: *FSL's MNI ICBM 152 non-linear 6th Generation Asymmetric Average Brain Stereotaxic Registration Model* [RRID:SCR\_002823; TemplateFlow ID: MNI152NLin6Asym].

### Functional data preprocessing

For each of the BOLD runs found per subject (across all tasks and sessions), the following preprocessing was performed. First, a reference volume and its skull-stripped version were generated using a custom methodology of *fmriPrep*. A B0-nonuniformity map (or *fieldmap*) was estimated based on two (or more) echo-planar imaging (EPI) references with opposing phase-encoding directions, with *3dQwarp* from AFNI 20160207 [7]. Based on the estimated susceptibility distortion, a corrected EPI (echo-planar imaging) reference was calculated for a more accurate co-registration with the anatomical reference. The BOLD reference was then co-registered to the T1w reference using *flirt* [8] from FSL 5.0.9, with the boundary-based registration cost-function [9]. Co-registration was configured with nine degrees of freedom to account for distortions remaining in the BOLD reference. Head-motion parameters with

respect to the BOLD reference (transformation matrices, and six corresponding rotation and translation parameters) are estimated before any spatiotemporal filtering using `mcflirt` [8] from FSL 5.0.9. BOLD runs were slice-time corrected using `3dTshift` from AFNI 20160207 [7]. The BOLD time-series (including slice-timing correction when applied) were resampled onto their original, native space by applying a single, composite transform to correct for head-motion and susceptibility distortions. These resampled BOLD time-series will be referred to as *preprocessed BOLD in original space*, or just *preprocessed BOLD*. The BOLD time-series were resampled into standard space, generating a *preprocessed BOLD run in MNI152NLin6Asym space*. First, a reference volume and its skull-stripped version were generated using a custom methodology of *fMRIPrep*. Automatic removal of motion artifacts using independent component analysis (ICA-AROMA) [10] was performed on the *preprocessed BOLD on MNI space* time-series after removal of non-steady state volumes and spatial smoothing with an isotropic, Gaussian kernel of 6mm FWHM (full-width half-maximum). Corresponding "non-aggressively" denoised runs were produced after such smoothing. Additionally, the "aggressive" noise-regressors were collected and placed in the corresponding confounds file. Several confounding time-series were calculated based on the *preprocessed BOLD*: framewise displacement (FD), DVARS and three region-wise global signals. FD and DVARS are calculated for each functional run, both using their implementations in *Nipype* [following the definitions by [11]]. The three global signals are extracted within the CSF, the WM, and the whole-brain masks. Additionally, a set of physiological regressors were extracted to allow for component-based noise correction (*CompCor*) [12]. Principal components are estimated after high-pass filtering the *preprocessed BOLD* time-series (using a discrete cosine filter with 128s cut-off) for the two *CompCor* variants: temporal (tCompCor) and anatomical (aCompCor). tCompCor components are then calculated from the top 5% variable voxels within a mask covering the subcortical regions. This subcortical mask is obtained by heavily eroding the brain mask, which ensures it does not include cortical GM regions. For aCompCor, components are calculated within the intersection of the aforementioned mask and the union of CSF and WM masks calculated in T1w space, after their projection to the native space of each functional run (using the inverse BOLD-to-T1w transformation). Components are also calculated separately within the WM and CSF masks. For each *CompCor* decomposition, the  $k$  components with the largest singular values are retained, such that the retained components' time series are sufficient to explain 50 percent of variance across the nuisance

mask (CSF, WM, combined, or temporal). The remaining components are dropped from consideration. The head-motion estimates calculated in the correction step were also placed within the corresponding confounds file. The confound time series derived from head motion estimates and global signals were expanded with the inclusion of temporal derivatives and quadratic terms for each [13]. Frames that exceeded a threshold of 0.5 mm FD or 1.5 standardised DVARS were annotated as motion outliers. All resamplings can be performed with *a single interpolation step* by composing all the pertinent transformations (i.e. head-motion transform matrices, susceptibility distortion correction when available, and co-registrations to anatomical and output spaces). Gridded (volumetric) resamplings were performed using `antsApplyTransforms` (ANTs), configured with Lanczos interpolation to minimize the smoothing effects of other kernels. Non-gridded (surface) resamplings were performed using `mri_vol2surf` (FreeSurfer). Many internal operations of *fMRIPrep* use *Nilearn* 0.6.0 [RRID:SCR\_001362], mostly within the functional processing workflow.

## References

- [1] O. Esteban *et al.*, “fMRIPrep: a robust preprocessing pipeline for functional MRI,” *Nat. Methods*, vol. 16, no. 1, pp. 111–116, Jan. 2019, doi: 10.1038/s41592-018-0235-4. [Online]. Available: <http://dx.doi.org/10.1038/s41592-018-0235-4>
- [2] K. Gorgolewski *et al.*, “Nipype: a flexible, lightweight and extensible neuroimaging data processing framework in python,” *Front. Neuroinform.*, vol. 5, p. 13, Aug. 2011, doi: 10.3389/fninf.2011.00013. [Online]. Available: <http://dx.doi.org/10.3389/fninf.2011.00013>
- [3] N. J. Tustison *et al.*, “N4ITK: improved N3 bias correction,” *IEEE Trans. Med. Imaging*, vol. 29, no. 6, pp. 1310–1320, Jun. 2010, doi: 10.1109/TMI.2010.2046908. [Online]. Available: <http://dx.doi.org/10.1109/TMI.2010.2046908>
- [4] B. B. Avants, C. L. Epstein, M. Grossman, and J. C. Gee, “Symmetric diffeomorphic image registration with cross-correlation: evaluating automated labeling of elderly and neurodegenerative brain,” *Med. Image Anal.*, vol. 12, no. 1, pp. 26–41, Feb. 2008, doi: 10.1016/j.media.2007.06.004. [Online]. Available: <http://dx.doi.org/10.1016/j.media.2007.06.004>
- [5] Y. Zhang, M. Brady, and S. Smith, “Segmentation of brain MR images through a hidden Markov random field model and the expectation-maximization algorithm,” *IEEE Trans. Med. Imaging*, vol. 20, no. 1, pp. 45–57, Jan. 2001, doi: 10.1109/42.906424. [Online]. Available: <http://dx.doi.org/10.1109/42.906424>
- [6] B. Fischl, “FreeSurfer,” *Neuroimage*, vol. 62, no. 2, pp. 774–781, Aug. 2012, doi: 10.1016/j.neuroimage.2012.01.021. [Online]. Available: <http://dx.doi.org/10.1016/j.neuroimage.2012.01.021>
- [7] R. W. Cox, “AFNI: what a long strange trip it’s been,” *Neuroimage*, vol. 62, pp. 743–747, Aug. 2012, doi: 10.1016/j.neuroimage.2011.08.056. [Online]. Available: <http://dx.doi.org/10.1016/j.neuroimage.2011.08.056>
- [8] M. Jenkinson, P. Bannister, M. Brady, and S. Smith, “Improved Optimization for the Robust and Accurate Linear Registration and Motion Correction of Brain Images,” *Neuroimage*, vol. 17, no. 2, pp. 825–841, Oct. 2002, doi: 10.1006/nimg.2002.1132. [Online]. Available: <http://www.sciencedirect.com/science/article/pii/S1053811902911328>

- [9] D. N. Greve and B. Fischl, "Accurate and robust brain image alignment using boundary-based registration," *Neuroimage*, vol. 48, pp. 63–72, Oct. 2009, doi: 10.1016/j.neuroimage.2009.06.060. [Online]. Available: <http://dx.doi.org/10.1016/j.neuroimage.2009.06.060>
- [10] R. H. R. Pruim, M. Mennes, D. van Rooij, A. Llera, J. K. Buitelaar, and C. F. Beckmann, "ICA-AROMA: A robust ICA-based strategy for removing motion artifacts from fMRI data," *Neuroimage*, vol. 112, pp. 267–277, May 2015, doi: 10.1016/j.neuroimage.2015.02.064. [Online]. Available: <http://dx.doi.org/10.1016/j.neuroimage.2015.02.064>
- [11] J. D. Power, K. A. Barnes, A. Z. Snyder, B. L. Schlaggar, and S. E. Petersen, "Spurious but systematic correlations in functional connectivity MRI networks arise from subject motion," *Neuroimage*, vol. 59, pp. 2142–2154, Feb. 2012, doi: 10.1016/j.neuroimage.2011.10.018. [Online]. Available: <http://dx.doi.org/10.1016/j.neuroimage.2011.10.018>
- [12] Y. Behzadi, K. Restom, J. Liau, and T. T. Liu, "A component based noise correction method (CompCor) for BOLD and perfusion based fMRI," *Neuroimage*, vol. 37, no. 1, pp. 90–101, Aug. 2007, doi: 10.1016/j.neuroimage.2007.04.042. [Online]. Available: <http://dx.doi.org/10.1016/j.neuroimage.2007.04.042>
- [13] T. D. Satterthwaite *et al.*, "An improved framework for confound regression and filtering for control of motion artifact in the preprocessing of resting-state functional connectivity data," *Neuroimage*, vol. 64, pp. 240–256, Jan. 2013, doi: 10.1016/j.neuroimage.2012.08.052. [Online]. Available: <http://dx.doi.org/10.1016/j.neuroimage.2012.08.052>
